## RESEARCH ARTICLE

# Determinants of comprehensive knowledge of HIV transmission and prevention among women of reproductive age 15–49 years in Nigeria

Charles Nzelu<sup>1</sup>\*, Uche Nzelu<sup>2</sup>, Amara Uche Ugwunze<sup>1</sup>, Ngozi Azodoh<sup>3</sup>

**1** Department of Special Projects, Federal Ministry of Health Nigeria, Abuja, Nigeria, **2** National Examinations Council, Nigeria, **3** Department of Health Planning, Research and Statistics, Federal Ministry of Health Nigeria, Abuja, Nigeria

\* These authors contributed equally to this work.

\* [charlesnzelu@yahoo.co.uk](mailto:charlesnzelu@yahoo.co.uk)

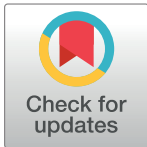

## Abstract

Comprehensive knowledge of HIV transmission and prevention has been reported as a necessary factor for ending the HIV epidemic. Women of reproductive age identified as a vulnerable group to HIV infection require this knowledge to prevent contracting HIV infection. Therefore, this study aimed to identify those factors that impact these women's comprehensive knowledge of HIV transmission and prevention. This study used secondary data from the 2018 Nigerian Demographic and Health Survey. A weighted sample of women of reproductive age with complete data on the determinants and comprehensive knowledge of HIV was included in each analysis. The Chi-square test of Independence was used to determine the association between the determinants and the dependent variable. Bivariable and multivariable logistic regression analysis was done to predict the effects of the determinants on the comprehensive knowledge of women of reproductive age. Variables with a p-value of  $\leq .01$  were considered statistically significant determinants of comprehensive knowledge of HIV transmission and prevention. The findings showed that women of reproductive age with no or lower level of education, living in rural areas, poor wealth index, do not listen or listen less frequently to radio, and watch television less frequently were more likely to have comprehensive knowledge of HIV transmission and prevention at Alpha = .01. The number of women with comprehensive knowledge of HIV was low compared with those with no comprehensive knowledge. This is a concern that needs to be addressed. Further studies using primary data to validate the findings of this study that individuals with no or lower level of education, living in rural areas, poorer or middle wealth index, do not listen or listen less frequently to radio and do not watch or watch less frequently television were more likely to have comprehensive knowledge of HIV transmission and prevention are recommended.

## OPEN ACCESS

**Citation:** Nzelu C, Nzelu U, Ugwunze AU, Azodoh N (2024) Determinants of comprehensive knowledge of HIV transmission and prevention among women of reproductive age 15–49 years in Nigeria. *PLOS Glob Public Health* 4(7): e0003450. <https://doi.org/10.1371/journal.pgph.0003450>

**Editor:** Muhammad Naveed Noor, Aga Khan University, PAKISTAN

**Received:** December 28, 2023

**Accepted:** June 13, 2024

**Published:** July 30, 2024

**Copyright:** © 2024 Nzelu et al. This is an open access article distributed under the terms of the [Creative Commons Attribution License](https://creativecommons.org/licenses/by/4.0/), which permits unrestricted use, distribution, and reproduction in any medium, provided the original author and source are credited.

**Data Availability Statement:** The data is freely available at [https://www.dhsprogram.com/data/dataset/Nigeria\\_Standard-DHS\\_2018.cfm](https://www.dhsprogram.com/data/dataset/Nigeria_Standard-DHS_2018.cfm).

**Funding:** The authors received no specific funding for this work.

**Competing interests:** The authors have declared that no competing interests exist.

## Introduction

At the end of 2020, about 37.7 million individuals are living with HIV globally [1]. New infections were 1.5 million, while 680,000 persons died from HIV/AIDS-related illnesses [1]. In Nigeria, the prevalence of HIV is 1.3% (male and female 15–49 years), with about 1.7 million individuals living with the virus at the end of 2020, and the country is rated fourth globally in terms of the HIV epidemic burden [1]. Women of reproductive age 15–49 years accounted for 56.47% of this number, with a prevalence rate of 1.6% in this age group [1]. Restricted educational and employment opportunities, poor negotiation of safe sex, poor economic empowerment, socio-cultural practices, and early or forced marriage increase the likelihood of HIV infection in women of reproductive age [2,3]. According to the 2018 Nigeria HIV/AIDS Indicator and Impact Survey, new infections are two times more likely to occur among women of reproductive age than men in the same age group [4]. Children become orphans and vulnerable due to the impact of HIV on this population group, resulting in adverse effects on the social and health systems in Nigeria [1].

In Nigeria, the 2013 Nigeria Demographic and Health Survey (NDHS) reported that 27% of women of reproductive age have comprehensive knowledge of HIV transmission and prevention, while the figure was reported as 46% in the 2018 NDHS [5,6]. This represents an increase of 19%. The 2018 NDHS reported that comprehensive knowledge of HIV prevention and control among young women aged 15–24 was 43%. It also reported that 71% of women of reproductive age in Nigeria knew that the use of condoms consistently and having sexual intercourse with only one uninfected partner reduces the risk of contracting HIV [6]. The 2018 NDHS definition of comprehensive knowledge of HIV transmission and prevention, which is the same as United Nations Children Fund (UNICEF) HIV comprehensive knowledge criteria, includes that an individual should know that consistent use of condoms during sexual intercourse and having just one uninfected faithful partner can reduce the chances of getting HIV, a healthy-looking person can have HIV, and rejecting the two most common local misconceptions about the transmission and prevention of HIV [6]. The definition or criteria entails that an individual knows the modes of HIV transmission and prevention and behaviours that minimize the spread of the virus, which are key to controlling the HIV epidemic. These modes and behaviours are necessary for individuals to engage in preventive health behaviours and reduce stigmatization and discriminatory practices against persons living with HIV/AIDS [7–9]. This study adapted the same criteria above for grading comprehensive knowledge, which includes knowing the two major ways of preventing the sexual transmission of HIV (using condoms and limiting sex to one faithful, uninfected partner), rejecting the two most common local misconceptions about HIV transmission and that a healthy-looking person can be HIV-positive [10]. However, we used the three most common local misconceptions about HIV transmission instead of the two used by UNICEF in the grading of comprehensive knowledge of HIV transmission and prevention.

Studies have reported that wealth index, level of education, access to radio, HIV testing, gender, place of residence, knowing of a place to test for HIV, use of traditional contraceptive methods, watching television, ownership of mobile phone, female head of household, marital status, ever tested for HIV, religion, age, age at sexual debut impacted on an individual's comprehensive knowledge of HIV [11–20]. This study assessed the effects of some of these determinants of comprehensive knowledge of HIV transmission and prevention, namely educational level, wealth index, watching television and listening to the radio, marital status, age categories, place of residence, and religion that data were collected on in the 2018 NDHS it so that the findings will aid the development of informed policies, appropriate strategies, and interventions to tackle the HIV epidemic in Nigeria.

## Materials and methods

### Data source

This study used the 2018 NDHS data of women of reproductive age 15–49 years. This is a nationally representative study that used a two-stage stratified cluster design to select the study participants in Nigeria and collect data on the variables of interest using the women's questionnaire. The detailed 2018 survey methodology has been described elsewhere [6].

### Variables measures

The measure for the dependent variable, comprehensive knowledge of HIV prevention and transmission, was created using the respondents' responses to the UNICEF definition of HIV comprehensive knowledge for young people 15–25 years [10]. This definition was adapted to women of reproductive age 15–49 years and includes that they identify a) two major correct ways of HIV sexual transmission prevention, i.e., having sex with only one faithful uninfected partner and consistent use of condom during sexual intercourse; b) rejection of three most common local misconceptions about transmission of HIV (i.e., a) a person can get HIV from Mosquito bite, b) a person can get HIV by sharing food with an infected person, c) a person can get HIV by witchcraft or supernatural means; d) knowing that a healthy-looking person can have HIV infection. These were graded as  $< 6$  = no comprehensive knowledge of HIV prevention and transmission if the women answered less than six questions correctly and coded as 0; 6 = comprehensive knowledge of HIV if the women answered all six questions correctly. The "I don't know category" was treated as user-defined missing data. Sociodemographic variables identified in previous studies as determinants of comprehensive knowledge of HIV and which data were collected in the primary study were included in the study as predictor variables. The identified variables include Age Categories, Marital Status, Religion, Place of Residence, Wealth Index, Frequency of Listening to Radio, and Frequency of Watching Television. They were measured on the nominal scale except for Age Categories and Educational level, which were measured on the ordinal scale. The age of the women was categorized in ascending order into five-year interval groups. Place of Residence was coded as (Rural = 0; Urban = 1); Educational Level was recoded as (No Education = 0, Primary Education = 1, Secondary and Higher Education = 2); Religion recoded as (Christian = 1 (combining Catholic and Other Christian), Islam = 2); Marital Status categories recoded as Currently Married (combining married and living with a partner as if married) = 1, Not currently Married (combining other options) = 0; Household wealth index coded as (poor household wealth index = 0 (combining poorest and poorer), average household wealth index coded = 1, rich household wealth index = 2 (combining richer and richest); Frequency of Listening to Radio coded as (Not at all = 0, less than once a week = 1, at least once a week = 2); Frequency of Watching Television coded as (Not at all = 0, less than once a week = 1, at least once a week = 2).

### Data management and analysis

Statistical Package for Social Sciences (SPSS) Version 28 was used for the study analysis. The level of significance was set at  $\text{Alpha} = .05$ . Statistical analysis included women of reproductive age 15–49 years with complete data on variables of interest. Logistic Regression and Chi-Square tests of association were used to assess the relationship between the determinants (predictor variables) and comprehensive knowledge of HIV transmission and knowledge. Type 1 Error was controlled for due to the large sample size of the Demographic and Health Survey by reducing the level of significance from  $\text{Alpha} = .05$  to  $.01$  [21]. Sample weights provided by the Demographic and Health Survey programs (DHS) were used for the analysis of the data to

ensure the representativeness of the survey findings due to the non-proportional allocation of samples to states and places of residence, including the different response rates in the primary study [6]. Bivariate and multivariable regression analyses were conducted. Predictor variables that were not statistically significant at  $\text{Alpha} = .01$  in the bivariate analysis were omitted from the multivariable regression analysis. Crude and adjusted odds ratios with a 99% confidence interval were reported for different categories of the predictor variables relative to their reference categories. Determinants with a  $p$ -value of  $\leq 0.01$  in the multivariable regression analysis were taken as a statistically significant factor associated with comprehensive knowledge of HIV transmission and prevention by women of reproductive age in Nigeria.

Because this study is a secondary data analysis of the 2018 NDHS, all women of reproductive age with complete data were included in the study analysis. The increase in sample size increased the precision of the study, reduced standard error, and increased statistical power [22]. The descriptive analysis of the variables of interest showed that none of the cases had more than 10% missing data. Therefore, listwise deletion was applied to handle the missing data [23]. Cross-tabulations were done between the predictors and dependent variables to get the valid weighted frequencies and percentages.

## Results

The study sample size was 41821 women of reproductive age; however, only the number of cases or respondents with complete data on the dependent variable (comprehensive knowledge of HIV transmission and prevention) were included in each analysis. The participants' demographic characteristics are presented in [Table 1](#). The sociodemographic variables included in this study are Age Categories, Educational Level, Place of Residence, Current Marital Status, Religion, Wealth Index, and Frequency of Listening to Radio and Watching Television. Women of reproductive age 15–19 years were highest in the sample with 19.4%, while those between 45–49 years were the least with 8.9%. Women with secondary and higher education were highest in the sample, with 52.5%, followed by those with no education (33.1%) and primary education (14.4%). Most of the women lived in rural areas and most were married, (69.6%). Most of the respondents do not have comprehensive knowledge of HIV transmission and prevention (97.2%).

The number of women with comprehensive knowledge was 1108 (2.8%), while those without comprehensive knowledge were 38231 (97.2%). [Fig 1](#) shows the detailed frequency distribution of knowledge of HIV transmission and prevention among women of reproductive age 15–49 years in Nigeria.

Most of the women of reproductive age do not have comprehensive knowledge of HIV transmission and prevention.

[Table 2](#) shows the Chi-square test of association between the women of reproductive age sociodemographic characteristic and their comprehensive knowledge of HIV transmission and prevention. The Chi-square result showed that educational level, place of residence, wealth index, and frequencies of listening to radio or watching television were statistically significantly associated with comprehensive knowledge of HIV transmission and prevention at  $\text{Alpha} \leq 0.01$ . Age categories, current marital status, and religion were not statistically significantly associated with comprehensive knowledge of HIV.

The crude and adjusted odds ratios from bivariate and multivariable logistic regression analysis are presented in [Table 3](#). Women of reproductive age with No Education (AOR = 1.39: 99% CI; 1.11, 1.74) and those with Primary Education (AOR = 1.69: 99% CI; 1.33, 2.15) were statistically significantly more likely to have comprehensive knowledge of HIV transmission and prevention than those with secondary or higher levels of education. Women

**Table 1. The frequency distribution of social and demographic characteristics of the women of reproductive age 15–49 years in Nigeria.**

| Predictors                                                        | Weighted Frequency (n) | Weighted Percent (%) |
|-------------------------------------------------------------------|------------------------|----------------------|
| <b>Educational Level</b>                                          |                        |                      |
| No Education                                                      | 13030                  | 33.1                 |
| Primary Education                                                 | 5673                   | 14.4                 |
| Secondary/Higher Education                                        | 20636                  | 52.5                 |
| <b>Age Categories (Years)</b>                                     |                        |                      |
| 15–19                                                             | 7636                   | 19.4                 |
| 20–24                                                             | 6485                   | 16.5                 |
| 25–29                                                             | 6838                   | 17.4                 |
| 30–34                                                             | 5906                   | 15.0                 |
| 35–39                                                             | 5215                   | 13.3                 |
| 40–44                                                             | 3761                   | 9.6                  |
| 45–49                                                             | 3496                   | 8.9                  |
| <b>Place of Residence</b>                                         |                        |                      |
| Urban                                                             | 18,499                 | 47.0                 |
| Rural                                                             | 20,839                 | 53.0                 |
| <b>Religion</b>                                                   |                        |                      |
| Christian                                                         | 18,599                 | 47.5                 |
| Islam                                                             | 20,556                 | 52.5                 |
| <b>Marital Status</b>                                             |                        |                      |
| Not Currently Married                                             | 11,954                 | 30.4                 |
| Currently Married                                                 | 27,385                 | 69.6                 |
| <b>Household Wealth Index</b>                                     |                        |                      |
| Poor Household Wealth Index                                       | 13,764                 | 35.0                 |
| Average Household Wealth Index                                    | 7,721                  | 19.6                 |
| Rich Household Wealth Index                                       | 17,853                 | 45.4                 |
| <b>Frequency of Listening to Radio</b>                            |                        |                      |
| Not at all                                                        | 16,741                 | 42.5                 |
| Less than once a week                                             | 10,526                 | 26.8                 |
| At least once a week                                              | 12,073                 | 30.7                 |
| <b>Frequency of Watching Television</b>                           |                        |                      |
| Not at all                                                        | 18,240                 | 46.4                 |
| Less than once a week                                             | 7,753                  | 19.7                 |
| At least once a week                                              | 13,344                 | 33.9                 |
| <b>Comprehensive knowledge of HIV Transmission and Prevention</b> |                        |                      |
| No Comprehensive HIV Knowledge of Transmission and Prevention     | 38,231                 | 97.2                 |
| Have Comprehensive HIV Knowledge of Transmission and Prevention   | 1,108                  | 2.8                  |

<https://doi.org/10.1371/journal.pgph.0003450.t001>

living in rural areas (AOR = 1.67; 99% CI; 1.35, 2.06) were statistically significantly more likely to have comprehensive knowledge of HIV transmission and prevention than those living in urban areas, while women with Poor Household Wealth Index (AOR = 1.55; 99% CI; 1.19, 2.03) were more likely to have comprehensive HIV knowledge than those with Rich Household Wealth Index. There was no statistically significant difference in the comprehensive knowledge of HIV between those with an Average Household Wealth Index (AOR = 1.27; 99%

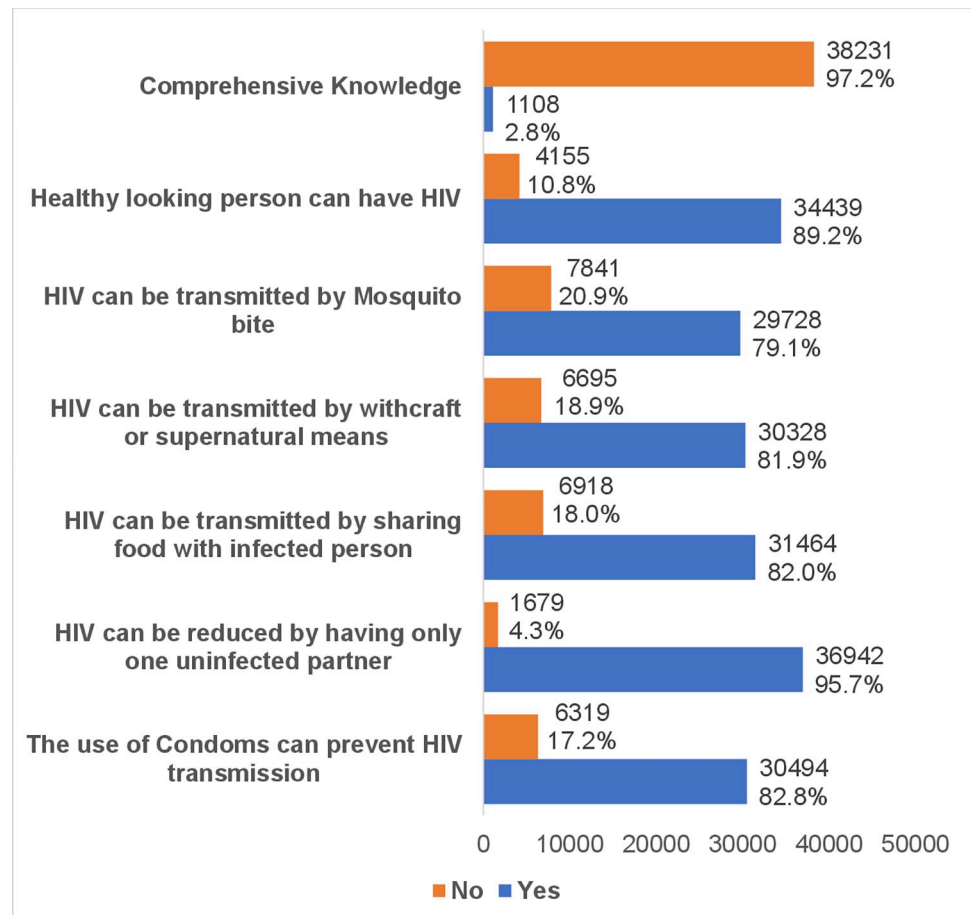

**Fig 1. Frequency distribution of knowledge of HIV transmission and prevention among women of reproductive age 15–49 years in Nigeria.**

<https://doi.org/10.1371/journal.pgph.0003450.g001>

CI; .98, 1.65) and those with a Rich Household Wealth Index. Frequencies of listening to radio and watching television were statistically significantly associated with comprehensive knowledge of HIV. Those who do not listen to the radio at all (AOR = 1.69; 99% CI: 1.33, 2.15) and those who listen less than once a week (AOR = 1.67; 99% CI; 1.29, 2.16) were more statistically significantly more likely to have comprehensive knowledge of HIV than those who listen at least once a week. Age Categories, Current Marital Status, and Religion were not statistically significant in the bivariate regression model at Alpha = .01 and were removed from the multivariable regression analysis model.

## Discussion

This study found that comprehensive knowledge of HIV transmission and prevention was low (2.8%) among women of reproductive age in Nigeria. Both chi-square and logistic regression analysis results showed that educational level, place of residence, wealth index, and frequencies of listening to the radio and watching television were statistically significantly associated with the women of reproductive age 15–49 years in Nigeria's comprehensive knowledge of HIV transmission and prevention at Alpha = .01. Age categories, religion of respondents, and marital status were not statistically significantly related to the women of reproductive age knowledge of HIV transmission and prevention in the bivariate model at Alpha = .01 and were

**Table 2. Chi-square test of association between comprehensive knowledge of HIV transmission and prevention of women of reproductive age (15–45 Years) in Nigeria and their sociodemographic characteristics.**

| Sociodemographic Variables              | Yes (Have Comprehensive knowledge) n/<br>% | No (No Comprehensive Knowledge) n/<br>% | Chi-square ( $\chi^2$ ), <i>p</i> -value             |
|-----------------------------------------|--------------------------------------------|-----------------------------------------|------------------------------------------------------|
| <b>Educational Level</b>                |                                            |                                         |                                                      |
| No Education                            | 537 (48.5)                                 | 12,492 (32.7)                           |                                                      |
| Primary Education                       | 222 (20.0)                                 | 5,452 (14.3)                            |                                                      |
| Secondary Education or Higher Education | 349 (31.5)                                 | 20,287 (53.0)                           | $\chi^2 = 202.21$ ; (df = 2); <i>p</i> -value < .001 |
| <b>Age Categories (Years)</b>           |                                            |                                         |                                                      |
| 15–19                                   | 234 (21.1)                                 | 7,402 (19.4)                            |                                                      |
| 20–24                                   | 191 (17.2)                                 | 6,294 (16.5)                            |                                                      |
| 25–29                                   | 185 (16.7)                                 | 6,653 (17.4)                            |                                                      |
| 30–34                                   | 158 (14.3)                                 | 5,748 (15.0)                            |                                                      |
| 35–39                                   | 128 (11.6)                                 | 5,087 (13.3)                            |                                                      |
| 40–44                                   | 93 (8.4)                                   | 3,668 (9.6)                             |                                                      |
| 45–49                                   | 119 (10.7)                                 | 3,377 (8.8)                             | $\chi^2 = 11.37$ ; (df = 6); <i>p</i> -value = .08   |
| <b>Place of Residence</b>               |                                            |                                         |                                                      |
| Rural                                   | 824 (74.4)                                 | 20,015 (52.4)                           |                                                      |
| Urban                                   | 284 (25.6)                                 | 18,215 (47.6)                           | $\chi^2 = 209.48$ ; (df = 1); <i>p</i> -value < .001 |
| <b>Religion</b>                         |                                            |                                         |                                                      |
| Christianity                            | 508 (45.9)                                 | 18,091 (47.5)                           |                                                      |
| Islam                                   | 598 (54.1)                                 | 19,958 (52.5)                           | $\chi^2 = 1.13$ ; (df = 1); <i>p</i> -value = .29    |
| <b>Marital Status</b>                   |                                            |                                         |                                                      |
| Not Currently Married                   | 301 (27.2)                                 | 11,653 (30.5)                           |                                                      |
| Currently Married                       | 807 (72.8)                                 | 26,578 (69.5)                           | $\chi^2 = 5.59$ ; (df = 1); <i>p</i> -value = .02    |
| <b>Household Wealth Index</b>           |                                            |                                         |                                                      |
| Poor Household Wealth Index             | 617 (55.7)                                 | 13,147 (34.4)                           |                                                      |
| Average Household Wealth Index          | 221 (19.9)                                 | 7,500 (19.6)                            |                                                      |
| Rich Household Wealth Index             | 270 (24.4)                                 | 17,583 (46.0)                           | $\chi^2 = 250.59$ ; (df = 2); <i>p</i> -value < .001 |
| <b>Frequency of Listening to Radio</b>  |                                            |                                         |                                                      |
| Not at all                              | 626 (56.4)                                 | 16,115 (42.2)                           |                                                      |
| Less than once a week                   | 304 (27.4)                                 | 10,222 (26.7)                           |                                                      |
| At least once a week                    | 179 (16.2)                                 | 11,894 (31.1)                           | $\chi^2 = 130.64$ ; (df = 2); <i>p</i> -value < .001 |
| <b>Frequency of Watching Television</b> |                                            |                                         |                                                      |
| Not at all                              | 708 (64.0)                                 | 17,532 (45.9)                           |                                                      |
| Less than once a week                   | 221 (20.0)                                 | 7,532 (19.7)                            |                                                      |
| At least once a week                    | 178 (16.1)                                 | 13,166 (34.4)                           | $\chi^2 = 182.93$ ; (df = 2); <i>p</i> -value < .001 |

<https://doi.org/10.1371/journal.pgph.0003450.t002>

omitted in the multivariable regression model. Interestingly, this study found that women with no education and primary education are more likely to have comprehensive knowledge of HIV transmission and prevention than women with higher education. This is surprising and a deviation from what most studies reported on this relationship. Studies have reported that women of reproductive age with higher levels of education are more likely to have comprehensive knowledge of education than those with lower levels of education [11,12,18,19,24]. However, a Nigerian study done in Akwa Ibom, Nigeria, reported that the level of education

**Table 3. The bivariable and multivariable logistic regression analysis of determinants of comprehensive knowledge of HIV transmission and prevention of women of reproductive age.**

| Predictors                              | COR (99% C.I.), <i>p</i> -value           | AOR (99% C.I.), <i>p</i> -value     |
|-----------------------------------------|-------------------------------------------|-------------------------------------|
| <b>Educational Level</b>                |                                           | <i>p</i> = .000                     |
| No Education                            | 2.51 (2.09, 2.10)                         | 1.39 (1.11, 1.74); <i>p</i> < 0.001 |
| Primary Education                       | 2.37 (1.89, 2.96)                         | 1.69 (1.33, 2.15); <i>p</i> < 0.001 |
| Secondary and Higher Education          | <i>Ref.</i>                               | <i>Ref.</i>                         |
| <b>Age Categories (Years)</b>           | .08                                       |                                     |
| 15–19                                   | .90 (.672, 1.21)                          |                                     |
| 20–24                                   | .86 (.64, 1.17)                           |                                     |
| 25–29                                   | .79 (.58, 1.07)                           |                                     |
| 30–34                                   | .78 (.57, 1.07)                           |                                     |
| 35–39                                   | .72 (.51, 1.00)                           |                                     |
| 40–44                                   | .72 (.50, 1.03)                           |                                     |
| 45–49                                   | <i>Ref.</i>                               | <i>Ref.</i>                         |
| <b>Place of Residence</b>               |                                           | <i>p</i> = .000                     |
| Rural                                   | 2.64 (2.21, 3.16)                         | 1.67 (1.35, 2.06); <i>p</i> < .001  |
| Urban                                   | <i>Ref.</i>                               | <i>Ref.</i>                         |
| <b>Religion</b>                         |                                           | .000                                |
| Christianity                            | .94 (.80, 1.10), <i>p</i> = .29           |                                     |
| Islam                                   | <i>Ref.</i>                               |                                     |
| <b>Marital Status</b>                   |                                           |                                     |
| Not Currently Married                   | .85 (.71, 1.02)                           |                                     |
| Currently Married                       | <i>Ref.</i>                               |                                     |
| <b>Household Wealth Index</b>           |                                           | <i>p</i> = .000                     |
| Poor Household Wealth Index             | 3.05 (2.52, 3.69)                         | 1.55 (1.19, 2.03); <i>p</i> < .001  |
| Average Household Wealth Index          | 1.92 (1.52, 2.43)                         | 1.27 (.98, 1.65); <i>p</i> < .019   |
| Rich Household Wealth Index             | <i>Ref.</i>                               | <i>Ref.</i>                         |
| <b>Frequency of Listening to Radio</b>  |                                           | <i>p</i> = .000                     |
| Not at all                              | 2.59 (2.07, 3.23); <i>p</i> < .001        | 1.69 (1.33, 2.15); <i>p</i> < .001  |
| Less than once a week                   | .198 (1.55, 2.53); <i>p</i> < .001        | 1.67 (1.29, 2.16); <i>p</i> < .001  |
| At least once a week                    | <i>Ref.</i>                               | <i>Ref.</i>                         |
| <b>Frequency of Watching Television</b> |                                           | <i>p</i> = .007                     |
| Not at all                              | 2.98 (2.40, 3.71); <i>p</i> < .001        | 1.22 (.92, 1.62) <i>p</i> = .074    |
| Less than once a week                   | 2.17 (1.67, 2.82); <i>p</i> -value < .001 | 1.41 (1.07, 1.87); <i>p</i> = .002  |
| At least once a week                    | <i>Ref.</i>                               | <i>Ref.</i>                         |

<https://doi.org/10.1371/journal.pgph.0003450.t003>

did not statistically significantly impact the comprehensive knowledge of HIV of young adolescents [25]. This was corroborated by another study done in Uganda [26]. This study found that women living in rural areas are more likely to have comprehensive knowledge of HIV than those in urban areas. This finding is surprising as rural dwellers are less likely to have access to electricity, radio, television, and internet, which will facilitate their access to information on HIV/AIDS [27]. Other studies done in Uganda, Nigeria, and Ethiopia [11,12,18,25,26] reported that women living in urban areas are more likely to have comprehensive knowledge than those living in rural areas. In this study, the household wealth index was significantly associated with comprehensive knowledge of HIV. Women in the poor household wealth index were statistically significantly more likely to have comprehensive knowledge of HIV than those in the rich household wealth index. This was supported by a study done in Ghana that reported a negative relationship between those in richer households and comprehensive

knowledge of HIV [18]. Other studies [11,12,19,26] have reported that women of reproductive age in rich household wealth index are more likely to have knowledge of HIV prevention than those in poor household wealth index. This study finding is surprising because women from the rich household wealth index are supposed to be better educated and have more access to mass communication media (radio, television, internet, and telephone) from where they can get information about HIV transmission and prevention.

Non-exposure and less frequent exposure to media such as radio and television were statistically significantly associated with having comprehensive knowledge of HIV transmission and prevention in this study. Interestingly, women of reproductive age who did not listen to the radio and those who listened less than once a week were 1.69 and 1.67 statistically significantly more likely to have knowledge of HIV transmission and prevention than those who listened at least once a week, respectively. Also, women who watched television less than once a week were more likely to have comprehensive knowledge than those who watched at least once a week. This is not consistent with what other studies have reported. Other studies have reported that exposure to media such as radio and television facilitated more likelihood of having comprehensive knowledge of HIV transmission and prevention [12,20]. In contrast, some other studies reported no difference in comprehensive knowledge due to exposure and non-exposure to media [18,19,25]. This finding is surprising as radio and television stations in Nigeria provide information to Nigerians on HIV/AIDS either as part of corporate social responsibility or as paid advertisements by relevant stakeholders.

In Nigeria, NDHS provides the country with up-to-date basic demographic and health indicators estimates and information including the indicators relevant to achieving the Sustainable Development Goals. Therefore, the programme managers should be trained and involved in the conduct of NDHS so that their understanding of the processes and results will be useful in programme design, implementation, and evaluation in the communities and in developing strategies for improving Nigeria's population health outcomes. Furthermore, the Demographic and Health Surveys conducted across many countries collect data on the required variables for defining HIV comprehensive knowledge, therefore, countries may not expend further funds in primary research to collect data on these needed variables.

A limitation of this study is the cross-sectional design of the primary research, which makes it unattainable to establish causality between the predictors and the dependent variable. Another limitation is recall bias, which may have impacted this study's findings because the Demographic and Health Survey was a self-report of the respondents who participated in the survey.

## Conclusion

This study found that educational level, place of residence, household wealth index, and frequency of listening to radio and watching television statistically significantly impacted the knowledge of HIV transmission and prevention. The identification of these predictors of comprehensive knowledge of HIV will assist in designing informed policies, strategies, and interventions for the control of the HIV epidemic in Nigeria. Most of this study's findings contradicted most studies on the relationship between the determinants and comprehensive knowledge of HIV transmission and prevention; therefore, further studies using primary data from the 2018 NDHS sample frame to validate this study's findings are recommended.

## Acknowledgments

We acknowledge the DHS Program for granting us access to the Demographic and Health Surveys dataset.

## Author Contributions

**Conceptualization:** Charles Nzelu, Uche Nzelu, Amara Uche Ugwuze, Ngozi Azodoh.

**Data curation:** Charles Nzelu, Uche Nzelu, Amara Uche Ugwuze, Ngozi Azodoh.

**Formal analysis:** Charles Nzelu, Uche Nzelu, Amara Uche Ugwuze, Ngozi Azodoh.

**Writing – original draft:** Charles Nzelu, Uche Nzelu.

**Writing – review & editing:** Charles Nzelu, Uche Nzelu, Amara Uche Ugwuze, Ngozi Azodoh.

## References

1. AIDSinfo | UNAIDS [Internet]. [cited 2021 Dec 3]. Available from: <https://aidsinfo.unaids.org/>.
2. Frew PM, Parker K, Vo L, Haley D, O'Leary A, Diallo DD, et al. Socioecological factors influencing women's HIV risk in the United States: qualitative findings from the women's HIV Seroincidence study (HPTN 064). *BMC Public Health* [Internet]. 2016 [cited 2021 Mar 22]; 16:803. Available from: <https://doi.org/10.1186/s12889-016-3364-7> PMID: 27530401
3. Sia D, Onadja Y, Hajizadeh M, Heymann SJ, Brewer TF, Nandi A. What explains gender inequalities in HIV/AIDS prevalence in sub-Saharan Africa? Evidence from the demographic and health surveys. *BMC Public Health*. 2016; 16:1136. <https://doi.org/10.1186/s12889-016-3783-5> PMID: 27809824
4. Federal Ministry of Health, Nigeria (FMOH). Nigeria HIV/AIDS Indicator and Impact Survey. 2019. Available from <http://ciheb.org/media/SOM/Microsites/CIHEB/documents/NAIIS-Report-2018.pdf>.
5. NPC/Nigeria NPC-, International ICF. Nigeria Demographic and Health Survey 2013. 2014 [cited 2021 Dec 5]; Available from: <https://dhsprogram.com/publications/publication-fr293-dhs-final-reports.cfm>.
6. Npc NPC-, ICF. Nigeria Demographic and Health Survey 2018—Final Report. 2019 [cited 2021 Dec 5]; Available from: <https://dhsprogram.com/publications/publication-fr359-dhs-final-reports.cfm>.
7. Atnafu Gebeyehu N, Yeshambel Wassie A, Abebe Gelaw K. Acceptance Of HIV Testing And Associated Factors Among Pregnant Women Attending Antenatal Care In Gunino Health Center, Southern Ethiopia 2019: An Institutional Based Cross-Sectional Study. *HIVAIDS Auckl NZ* [Internet]. 2019 [cited 2021 Apr 11]; 11:333–41. Available from: <https://www.ncbi.nlm.nih.gov/pmc/articles/PMC6897068/>.
8. Nubed CK, Akoachere J-FTK. Knowledge, attitudes and practices regarding HIV/AIDS among senior secondary school students in Fako Division, South West Region, Cameroon. *BMC Public Health*. 2016; 16:847. <https://doi.org/10.1186/s12889-016-3516-9> PMID: 27549185
9. Teklehaimanot HD, Teklehaimanot A, Yohannes M, Biratu D. Factors influencing the uptake of voluntary HIV counseling and testing in rural Ethiopia: a cross-sectional study. *BMC Public Health*. 2016; 16:239. <https://doi.org/10.1186/s12889-016-2918-z> PMID: 26955869
10. Opportunity in Crisis: Preventing HIV from early adolescence to young adulthood [Internet]. UNICEF DATA. 2011 [cited 2021 Dec 5]. Available from: <https://data.unicef.org/resources/opportunity-in-crisis-preventing-hiv-from-early-adolescence-to-young-adulthood/>.
11. Oginni AB, Adebajo SB, Ahonsi BA. Trends and Determinants of Comprehensive Knowledge of HIV among Adolescents and Young Adults in Nigeria: 2003–2013. *Afr J Reprod Health*. 2017; 21:26–34. <https://doi.org/10.29063/ajrh2017/v21i2.4> PMID: 29624937
12. Agegnehu CD, Geremew BM, Sisay MM, Muchie KF, Engida ZT, Gudayu TW, et al. Determinants of comprehensive knowledge of HIV/AIDS among reproductive age (15–49 years) women in Ethiopia: further analysis of 2016 Ethiopian demographic and health survey. *AIDS Res Ther* [Internet]. 2020 [cited 2021 Nov 10]; 17:51. Available from: <https://doi.org/10.1186/s12981-020-00305-z>.
13. Teshome R, Youjie W, Siraj N. Comparison and Association of Comprehensive HIV/AIDS Knowledge and Attitude towards people Living with HIV/AIDS among Women Aged 15–49 in Three East African Countries: Burundi, Ethiopia and Kenya. *J AIDS Clin Res*. 2016; 07.
14. Zainiddinov H, Habibov N. A Comparison of Comprehensive HIV/AIDS Knowledge Among Women Across Seven Post-Soviet Countries. *Cent Asian J Glob Health* [Internet]. 2018 [cited 2021 Nov 10]; 7:295. Available from: <https://www.ncbi.nlm.nih.gov/pmc/articles/PMC6393054/>. <https://doi.org/10.5195/cajgh.2018.295> PMID: 30863663
15. Zainiddinov H, Habibov N. Trends and predictors of knowledge about HIV/AIDS and its prevention and transmission methods among women in Tajikistan. *Eur J Public Health*. 2016; 26:1075–9. <https://doi.org/10.1093/eurpub/ckw077> PMID: 27259722

16. Yaya S, Bishwajit G, Danhouno G, Shah V, Ekholuenetale M. Trends and determinants of HIV/AIDS knowledge among women in Bangladesh. *BMC Public Health* [Internet]. 2016 [cited 2021 Dec 5]; 16:812. Available from: <http://bmcpublihealth.biomedcentral.com/articles/10.1186/s12889-016-3512-0>. <https://doi.org/10.1186/s12889-016-3512-0> PMID: 27535231
17. Gebremedhin S. Predictors of HIV/AIDS Knowledge and Attitude among Young Women of Nigeria and Democratic Republic of Congo: Cross-Sectional Study. *J AIDS Clin Res*. 2017; 8.
18. Fenny A, Crentsil A, Asuman D. Determinants and Distribution of Comprehensive HIV/AIDS Knowledge in Ghana. *Glob J Health Sci*. 2017; 9:32.
19. Estifanos TM, Hui C, Tesfai AW, Teklu ME, Ghebrehiwet MA, Embaye KS, et al. Predictors of HIV/AIDS comprehensive knowledge and acceptance attitude towards people living with HIV/AIDS among unmarried young females in Uganda: a cross-sectional study. *BMC Womens Health* [Internet]. 2021 [cited 2021 Dec 5]; 21:37. Available from: <https://doi.org/10.1186/s12905-021-01176-w> PMID: 33499860
20. Sheikh MT, Uddin MN, Khan JR. A comprehensive analysis of trends and determinants of HIV/AIDS knowledge among the Bangladeshi women based on Bangladesh Demographic and Health Surveys, 2007–2014. *Arch Public Health Arch Belg Sante Publique*. 2017; 75:59. <https://doi.org/10.1186/s13690-017-0228-2> PMID: 28975026
21. Asaolu IO, Gunn JK, Center KE, Koss MP, Iwelunmor JI, Ehiri JE. Predictors of HIV Testing among Youth in Sub-Saharan Africa: A Cross-Sectional Study. *PLOS ONE* [Internet]. 2016 [cited 2021 Nov 10]; 11:e0164052. Available from: <https://journals.plos.org/plosone/article?id=10.1371/journal.pone.0164052>. <https://doi.org/10.1371/journal.pone.0164052> PMID: 27706252
22. Armstrong RA. Is there a large sample size problem? *Ophthalmic Physiol Opt* [Internet]. 2019 [cited 2021 Jun 5]; 39:129–30. Available from: <https://onlinelibrary.wiley.com/doi/abs/10.1111/opo.12618>. PMID: 30994198
23. Mirzaei A, Carter SR, Patanwala AE, Schneider CR. Missing data in surveys: Key concepts, approaches, and applications. *Res Soc Adm Pharm* [Internet]. 2021 [cited 2021 Jun 13]; S1551741121001157. Available from: <https://linkinghub.elsevier.com/retrieve/pii/S1551741121001157>.
24. Van Huy N, Lee H-Y, Nam Y-S, Van Tien N, Huong TTG, Hoat LN. Secular trends in HIV knowledge and attitudes among Vietnamese women based on the Multiple Indicator Cluster Surveys, 2000, 2006, and 2011: what do we know and what should we do to protect them? *Glob Health Action*. 2016; 9:29247. <https://doi.org/10.3402/gha.v9.29247> PMID: 26950557
25. Badru T, Mwaisaka J, Khamofu H, Agbakwuru C, Adedokun O, Pandey SR, et al. HIV comprehensive knowledge and prevalence among young adolescents in Nigeria: evidence from Akwa Ibom AIDS indicator survey, 2017. *BMC Public Health* [Internet]. 2020 [cited 2021 Nov 24]; 20:1–10. Available from: <https://bmcpublihealth.biomedcentral.com/articles/10.1186/s12889-019-7890-y>.
26. Ankunda D. Determinants of comprehensive knowledge of HIV/AIDS among women of the reproductive age (15–49) in Uganda. 2017 [cited 2021 Nov 24]; Available from: <http://makir.mak.ac.ug/handle/10570/6435>.
27. Diress GA, Ahmed M, Linger M. Factors associated with discriminatory attitudes towards people living with HIV among adult population in Ethiopia: analysis on Ethiopian demographic and health survey. *SAHARA-J J Soc Asp HIVAIDS* [Internet]. 2020 [cited 2024 Jan 28]; 17:38–44. Available from: <https://doi.org/10.1080/17290376.2020.1857300> PMID: 33357027
